# Supplementary material
Source: Springer Nature journal article supplement (https://www.springermedizin.de/resource/supplementary/12889_2010_3100_MOESM1_ESM.pdf/9488218)

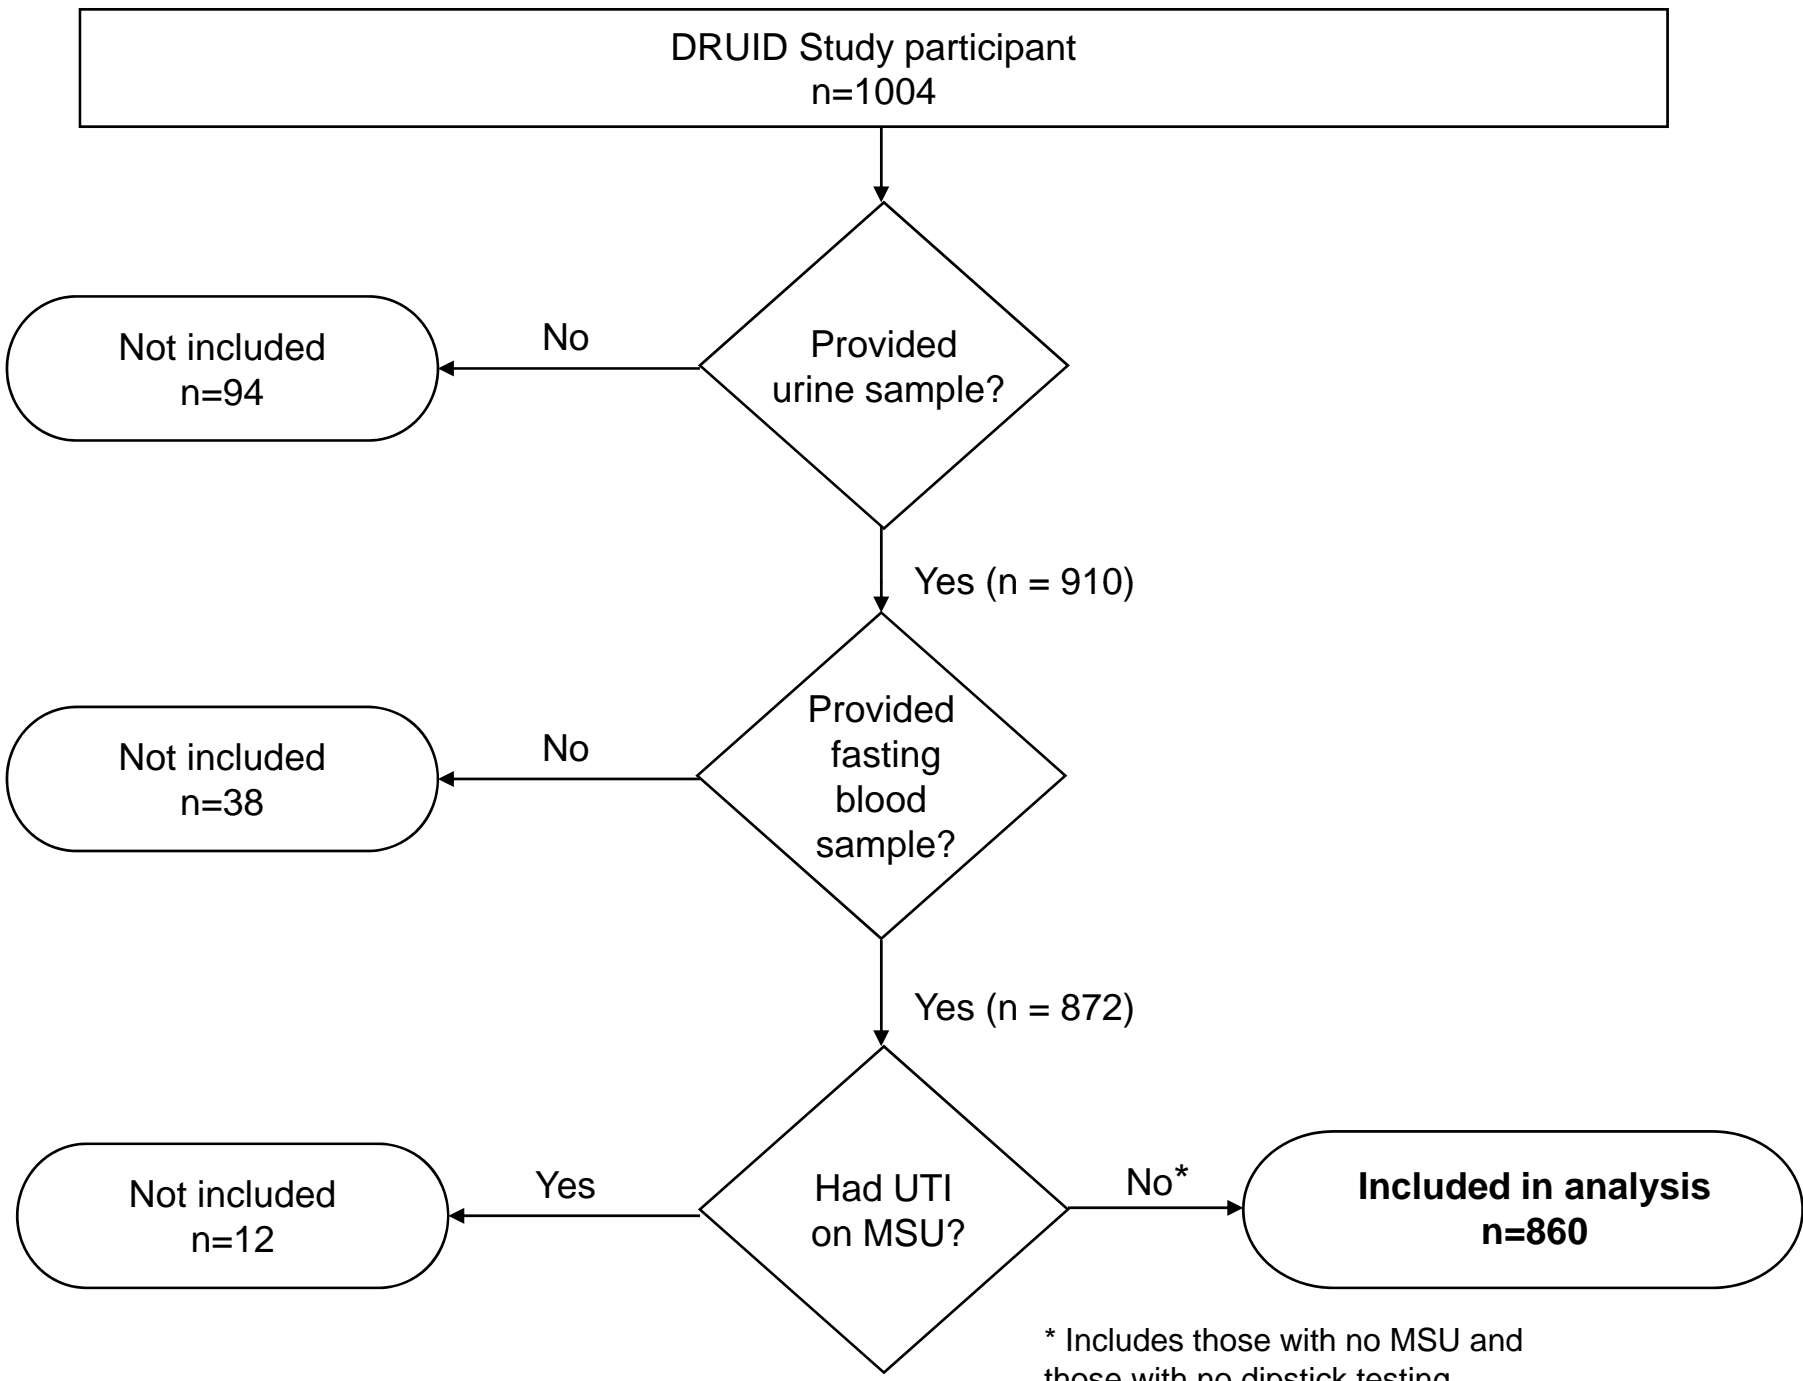

\* Includes those with no MSU and those with no dipstick testing

Supplement: MOESM1 [file 9488218]
